# Supplementary material
Source: PubMed Central journal article supplement (PMC3798836)
Supplement: ejhg201327x1.pdf [file ejhg201327x1.pdf]

## Supplementary Material

### Rapidly deteriorating course in Dutch Hereditary Spastic Paraplegia type 11 patients

Susanne T. de Bot<sup>1</sup>, MD, Rogier C. Burggraaff<sup>3</sup>, BSc, Johanna C. Herkert<sup>3</sup>, MD, Helenius J. Schelhaas<sup>1</sup>, MD, PhD, Bart Post<sup>1</sup>, MD, PhD, Adinda Diekstra<sup>2</sup>, BSc, Reinout O. van Vliet<sup>5</sup>, MD, Marjo S. van der Knaap<sup>6</sup>, MD, PhD, Erik-Jan Kamsteeg<sup>2</sup>, PhD, Hans Scheffer<sup>2</sup>, PhD, Bart P. van de Warrenburg<sup>1</sup>, MD, PhD, Corien C. Verschuuren-Bemelmans<sup>3</sup>, MD, and Hubertus P.H. Kremer<sup>4</sup>, MD, PhD.

### Illustrative long-term clinical follow-up of a SPG11 family (family 1 in Suppl. Table 1)

The consanguineous parents originating from Turkey had 11 children, two of whom died of an unspecified ‘infectious disease’ at age 6 months. Five of the nine surviving children developed complicated HSP (Figure S1). Age at onset of gait impairment, leg spasticity or learning difficulties was between 4 months and 20 years, after normal gestations and deliveries, and initially normal psychomotor development. The fifth child (patient II:5) has stayed in Turkey and has never visited a Dutch hospital, but some details from the history were available from a healthy sister. During follow-up, peripheral nerve and anterior horn cell degeneration developed with intrinsic hand muscle atrophy, confirmed by nerve conduction studies and nerve and muscle biopsies. The spastic paraplegia developed into a hypotonic weakness of the lower limbs, followed by the upper limbs, with serious flexion contractures. Learning disabilities developed in the same period, which forced them to switch to special needs education by the end of primary school. As cognitive decline progressed, language and verbal fluency became predominantly affected. Finally, the subjects lost spontaneous speech and after a disease duration of two to three decades they could only produce sounds. One patient also suffered a psychotic episode at age 24. Two subjects had mild cerebellar signs; extrapyramidal signs were absent.

Ultimately, all five patients became tetraplegic and completely wheelchair bound or bedridden, with severe dysphagia in at least two of them necessitating a percutaneous endoscopic gastrostomy (PEG) feeding tube. Two patients were obese and four had urinary incontinence, three of whom also had fecal incontinence. Four of the five affected siblings died of respiratory or cardiac complications, at ages 30 to 47. One of them is still alive, but is deteriorating rapidly.

Reviewing the brain MRIs – 15 years after the scans were made – revealed a thin corpus callosum and typical white matter changes, which led to a suspicion of SPG11. Subsequently, a homozygous pathogenic frameshift mutation was found in exon 6 (c.1203del; p. Asp402fs) in the two youngest affected siblings.

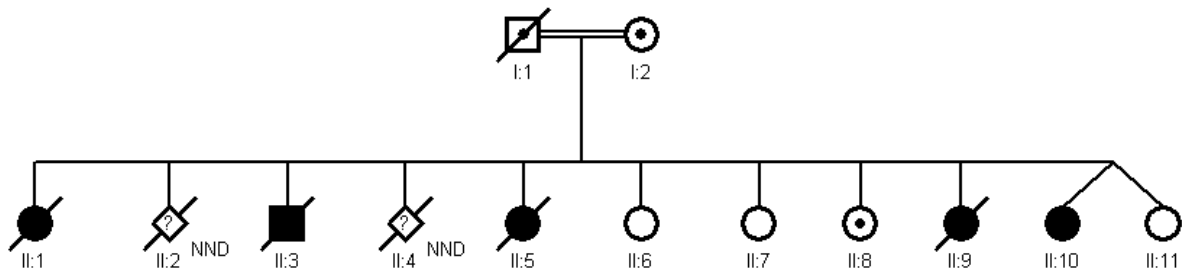

**FIGURE S1:** Pedigree of a Turkish family with consanguineous parents. Two children died at the age of 6 months, five children were affected by SPG11, of whom four have already died. Patient II:5 lived in Turkey and has never visited a Dutch hospital.

**Supplementary Table 1. Clinical characteristics of 18 SPG11 patients.**

| Family /origin | ID/sex    | Age at onset GI/leg spasticity (yr) | Age at onset LD (yr) | Symptom at onset | Age at last examination (yr)/sex | Disease duration (yr) at most recent examination | Severity leg spasticity | Wheel-chair bound at age (GI duration) yr | Cognitive impairment                     | Behav. problems (age) | Hand muscle wasting | Peripheral neuropathy | Sphincter dysfunction | Dysarthria | Dysphagia          | Cerebellar ataxia | Obesity         | Abnormalities retinal pigment | Other                                                                                                                  | Cerebral MRI   | Age at death | Cause of death                    |
|----------------|-----------|-------------------------------------|----------------------|------------------|----------------------------------|--------------------------------------------------|-------------------------|-------------------------------------------|------------------------------------------|-----------------------|---------------------|-----------------------|-----------------------|------------|--------------------|-------------------|-----------------|-------------------------------|------------------------------------------------------------------------------------------------------------------------|----------------|--------------|-----------------------------------|
| 1 TU           | 1-II-1/V  | 4                                   | <7                   | GI               | 26                               | 22                                               | severe                  | 16 (12)                                   | borderline-mild MR<br>+ cogn. decline    | -                     | +                   | +                     | +++                   | n/a        | n/a                | n/a               | -               | -                             | joint contractures, pes equinus                                                                                        | n/a            | 30           | Complication during surgery       |
|                | 1-II-3/M  | <1 (4 mths)                         | n/a                  | GI               | 24                               | 24                                               | Severe                  | 7 (7)                                     | borderline-mild MR<br>+ cogn. decline    | Aggressive period     | +                   | +                     | ++A                   | -          | +(PEG drip feed) A | +                 | -               | n/a                           | scapulae alatae, scoliosis, joint contractures, pes equinus, handtremor, <b>mutism</b> , EMG: motor neuron dysfunction | n/a            | 47           | pneumonia                         |
|                | 1-II-9/V  | 12                                  | 9                    | LD               | 38                               | 29                                               | severe                  | 25 (13)                                   | borderline-mild MR<br>severe cog decline | Psychosis (24 yr)     | +                   | +                     | +++                   | +          | +(PEG drip feed)   | +                 | ++ <sup>^</sup> | n/a                           | primary reflexes (snout, grip); pes excavates, joint contractures, <b>mutism</b>                                       | TCC, WMA*, STA | 38           | pneumonia                         |
|                | 1-II-10/V | 15                                  | 10                   | LD               | 37                               | 27                                               | severe                  | 26 (11)                                   | borderline-mild MR<br>severe cog decline | -                     | +                   | +                     | +++                   | +          | -                  | -                 | ++              | n/a                           | bruxism, pes excavatus, joint contractures                                                                             | TCC, WMA*, STA | N.A.         | N.A.                              |
| 2 NL           | 2-II-1/M  | 13                                  | n/a                  | GI               | 29                               | 16                                               | severe                  | 29 (16)                                   | borderline MR<br>+ cogn. decline         | -                     | n/a                 | -                     | +++A                  | +A         | -                  | n/a               | +A              | n/a                           | amblyopic OS, aphasia                                                                                                  | n/a            | 48           | pneumonia                         |
|                | 2-II-3/M  | 14                                  | n/a                  | GI               | 24                               | 10                                               | severe                  | 23 (9)                                    | borderline MR<br>+ cogn. decline         | -                     | +                   | +                     | +++A                  | +A         | +(PEG drip feed)   | n/a               | + <sup>^</sup>  | n/a                           | blindness (can only discriminate between light/dark), <b>mutism</b>                                                    | n/a            | 45           | upper respiratory tract infection |
|                | 2-II-4/V  | 11                                  | 13                   | GI               | 46                               | 35                                               | severe                  | 25 (14)                                   | borderline MR<br>+ cogn. decline         | -                     | +                   | +                     | +++                   | +          | +                  | +                 | + <sup>^</sup>  | -                             | Hypermetropia ODS, pes equines                                                                                         | n/a            | N.A.         | N.A.                              |
| 3NL            | 3-V-1/V   | 14                                  | 8                    | LD               | 20                               | 12                                               | moderate                | N.A.                                      | borderline MR                            | PDD-NOS               | n/a                 | -                     | -                     | -          | -                  | -                 | +               | n/a                           | fatigue                                                                                                                | TCC, WMA*, STA | N.A.         | N.A.                              |
|                | 3-V-2/M   | 14                                  | 8                    | LD               | 15                               | 7                                                | mild                    | N.A.                                      | borderline MR                            | ADHD                  | n/a                 | -                     | +                     | -          | n/a                | n/a               | +               | n/a                           |                                                                                                                        | TCC, WMA*      | N.A.         | N.A.                              |

SPG11: long-term prognosis

| Family /origin | ID/sex   | Age at onset GI/leg spasticity (yr) | Age at onset LD (yr) | Symptom at onset | Age at last examination (yr)/sex | Disease duration (yr) at most examination | Severity leg spasticity | Wheel-chair bound at age (GI duration) yr | Cognitive impairment             | Behav. problems (age) | Hand muscle wasting | Peripheral neuropathy | Sphincter dysfunction | Dysarthria | Dysphagia | Cerebellar ataxia | Obesity | Abnormalities retinal pigment | Other                                                                        | Cerebral MRI   | Age at death | Cause of death |
|----------------|----------|-------------------------------------|----------------------|------------------|----------------------------------|-------------------------------------------|-------------------------|-------------------------------------------|----------------------------------|-----------------------|---------------------|-----------------------|-----------------------|------------|-----------|-------------------|---------|-------------------------------|------------------------------------------------------------------------------|----------------|--------------|----------------|
| 4 NL           | 4-II-1/V | 12                                  | n/a                  | GI               | 30                               | 18                                        | severe                  | 28 (16)                                   | cogn. decline                    | -                     | n/a                 | -                     | ++                    | +          | +         | -                 | +       | -                             | fatigue myoclonus in adominal- and legmuscles ventricular tachycardia        | n/a            | N.A.         | N.A.           |
|                | 4-II-2/M | 10                                  | 5                    | LD               | 28                               | 23                                        | severe                  | 27(17)                                    | moderate MR + cogn decline       | Psychosis (26 yr)     | n/a                 | -                     | ++                    | +          | -         | +                 | +       | +                             | fatigue                                                                      | n/a            | N.A.         | N.A.           |
|                | 4-II-3/M | <10                                 | <10                  | GI               | 28                               | 18                                        | severe                  | 28 (18)                                   | borderline-mild MR+ cogn decline | Psychosis (28 yr)     | n/a                 | -                     | n/a                   | n/a        | -         | +                 | +       | +                             |                                                                              | n/a            | N.A.         | N.A.           |
|                | 4-II-4/V | 11                                  | 11                   | GI               | 22                               | 11                                        | severe                  | N.A.                                      | borderline-mild MR               | -                     | -                   | -                     | +                     | n/a        | +         | -                 | ++      | -                             | fatigue                                                                      | n/a            | N.A.         | N.A.           |
| 5 NL           | 5/M      | <10                                 | N.A.                 | GI               | 26                               | 16                                        | mild                    | N.A.                                      | cogn. decline                    | PDD-NOS               | -                   | -                     | +                     | +          | -         | +                 | ++      | n/a                           | EMG: motor neuron dysfunction                                                | TCC, WMA*, STA | N.A.         | N.A.           |
| 6 NL           | 6/M      | 8                                   | n/a                  | GI               | 27                               | 19                                        | severe                  | 22 (14)                                   | cogn. decline                    | -                     | -                   | -                     | +                     | +          | n/a       | -                 | -       | n/a                           | epilepsy as adult pes equinus                                                | TCC, WMA*, STA | N.A.         | N.A.           |
| 7 SO           | 7/M      | 2                                   | <10                  | GI               | 15                               | 13                                        | mild                    | N.A.                                      | mild MR                          | -                     | n/a                 | -                     | n/a                   | -          | n/a       | +                 | -       | n/a                           | gynaecomastia                                                                | TCC, WMA*, STA | N.A.         | N.A.           |
| 8 NL           | 8/M      | 22                                  | 4                    | LD               | 27                               | 23                                        | severe                  | 24 (2)                                    | moderate MR + cogn. decline      | Psychosis (24 yr)     | n/a                 | +                     | +++                   | +          | +         | +                 | +A      | n/a                           | pes equines                                                                  | TCC, WMA*, STA | N.A.         | N.A.           |
| 9 NL           | 9/M      | <8                                  | 2                    | LD               | 13                               | 11                                        | severe                  | 15A (7)                                   | mild MR + cogn decline           | PDD-NOS               | n/a                 | -                     | +                     | +          | n/a       | -                 | +       | n/a                           | colour-blindness, myopia, hyperlaxity, cafe-au-lait spot, pedes plano valgus | TCC, WMA*      | N.A.         | N.A.           |

A: from history after last examination, ADHD: Attention-Deficit/Hyperactivity Disorder, EMG: electromyography, GI: gait impairment, LD: learning difficulties,

MR: mental retardation according to Wechsler scale: IQ 90-110: normal, IQ 80-90: dull normal, IQ 70-79: borderline/ learning difficulties, IQ 50/55-70: mild MR, IQ 35/40-

55: moderate MR, IQ 20/25-40: severe MR, n/a: not available, N.A.: not applicable, NL: from the Netherlands, Obesity: defined as: - BMI< 25, + BMI 25-30, ++ BMI >30,

^: before dysphagia, PDD-NOS: Pervasive Developmental Disorder Not Otherwise Specified, PEG: percutaneous endoscopic gastrostomy, Sphincter dysfunctions: - no symptoms, + urinary urge, ++ urinary incontinence, +++ urinary and fecal incontinence, SO: from Somalia, TU: from Turkey, Cerebral MRI: STA: supratentorial atrophy, TCC: thin corpus callosum, WMA: white matter abnormalities \*typical “ears of the lynx sign”
